# Supplementary material for: Stress-driven emergence of heritable non-genetic drug resistance
Source: Research Square preprint supplement (doi:10.21203/rs.3.rs-5744219/v1), 2025-11-28
Supplement: Supplementary file 2 [file 2802255360fdb744a360366d.xlsx]

## Sheet: Sheet1
	MIC		Fold increase
#7 B8 DAY 7	1.36565	ug/ml	2.32228
#8 B9 DAY 7	1.24344	ug/ml	2.11446
#10 B11 DAY 14	1.20414	ug/ml	2.04764
#11 C2 DAY 14	1.2236	ug/ml	2.08072
#16 C7 DAY 21	1.57435	ug/ml	2.67717
#17 C8 DAY 21	1.44669	ug/ml	2.46008
#25 D6 DAY 28	1.20387	ug/ml	2.04718
#26 D7 DAY 28	1.20771	ug/ml	2.0537
#32 E3 DAY 35	1.20993	ug/ml	2.05748
#40 E11 DAY 35	1.58253	ug/ml	2.69108
SC5314 (control)	0.588065	ug/ml
