# Supplementary material for: Stress-driven emergence of heritable non-genetic drug resistance
Source: Research Square preprint supplement (doi:10.21203/rs.3.rs-5744219/v1), 2025-11-28
Supplement: Supplementary file 6 [file a15b416d11a4dab8ea848b0b.xlsx]

## Sheet: Sheet1
		PDR Phenotype	Ploidy	Mutation	Sequnecing Info
L1	a	Large white	Chr3 x 3 ABB and Chr5 x 3 ABB	orf19.4791 A300C (L100F)	A2
	b	Large pink	Chr5 x 3 ABB	N/A	A3
	c	Large white	Chr3 x 3 ABB and Chr5 x 3 ABB	N/A	A4
	d	Large white	Chr3 x 3 ABB	orf19.4380.1 G387A(syn), orf19.5238 A602G(H201R)	A5
L2	a	Small pink	Euploid	Naïve	A6
	b	Large pink	Chr3 x 3 ABB	intergenic	A7
	c	Large pink	Chr3 x 3 ABB	N/A	A8
L3	a	Small pink	Euploid	Naïve	D5
	b	Large white	Euploid	N/A	D6
